# Supplementary material for: The nuclear proteome of Trypanosoma brucei
Source: PubMed Central journal article supplement (PMC5519215; doi:10.1371/journal.pone.0181884), 2017-07-20
Supplement: pone.0181884.s001.pdf [file pone.0181884.s001.pdf]

Figure S1

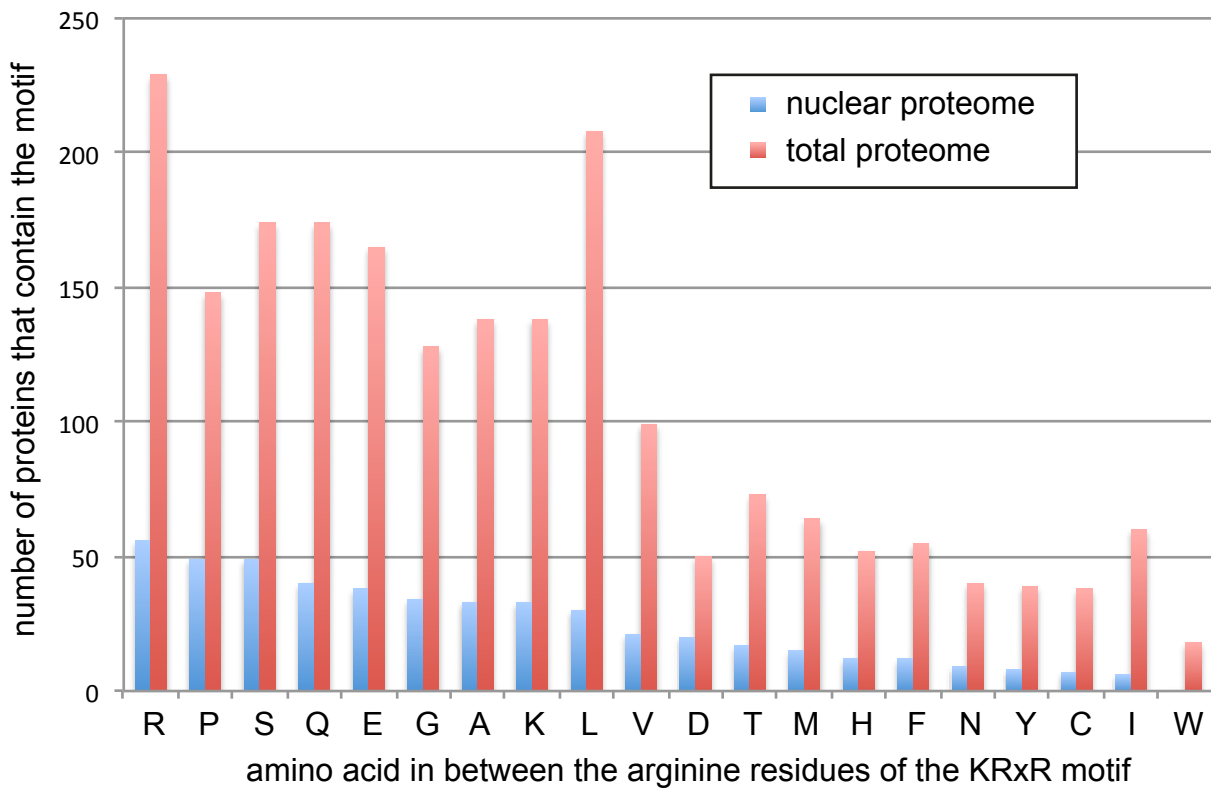

**S1 Fig:** The nuclear proteome and the total proteome of *T. brucei* Treu927 was searched for the KRxR motif with x being filled successively by all amino acids (x-axis). Note that the total number of proteins with the individual motifs is higher than the number of proteins that contain the KRxR motif, because some proteins contain several mixed motifs.
